# Supplementary material for: Increased proliferation and differentiation capacity of placenta-derived mesenchymal stem cells from women of median maternal age correlates with telomere shortening
Source: publisher site journal article supplement (doi:10.18632/aging.203724), 2021-11-29
Supplement: Supplementary file [file aging-v13i22-203724-supplementary-material-SD1.pdf]

## SUPPLEMENTARY FIGURES

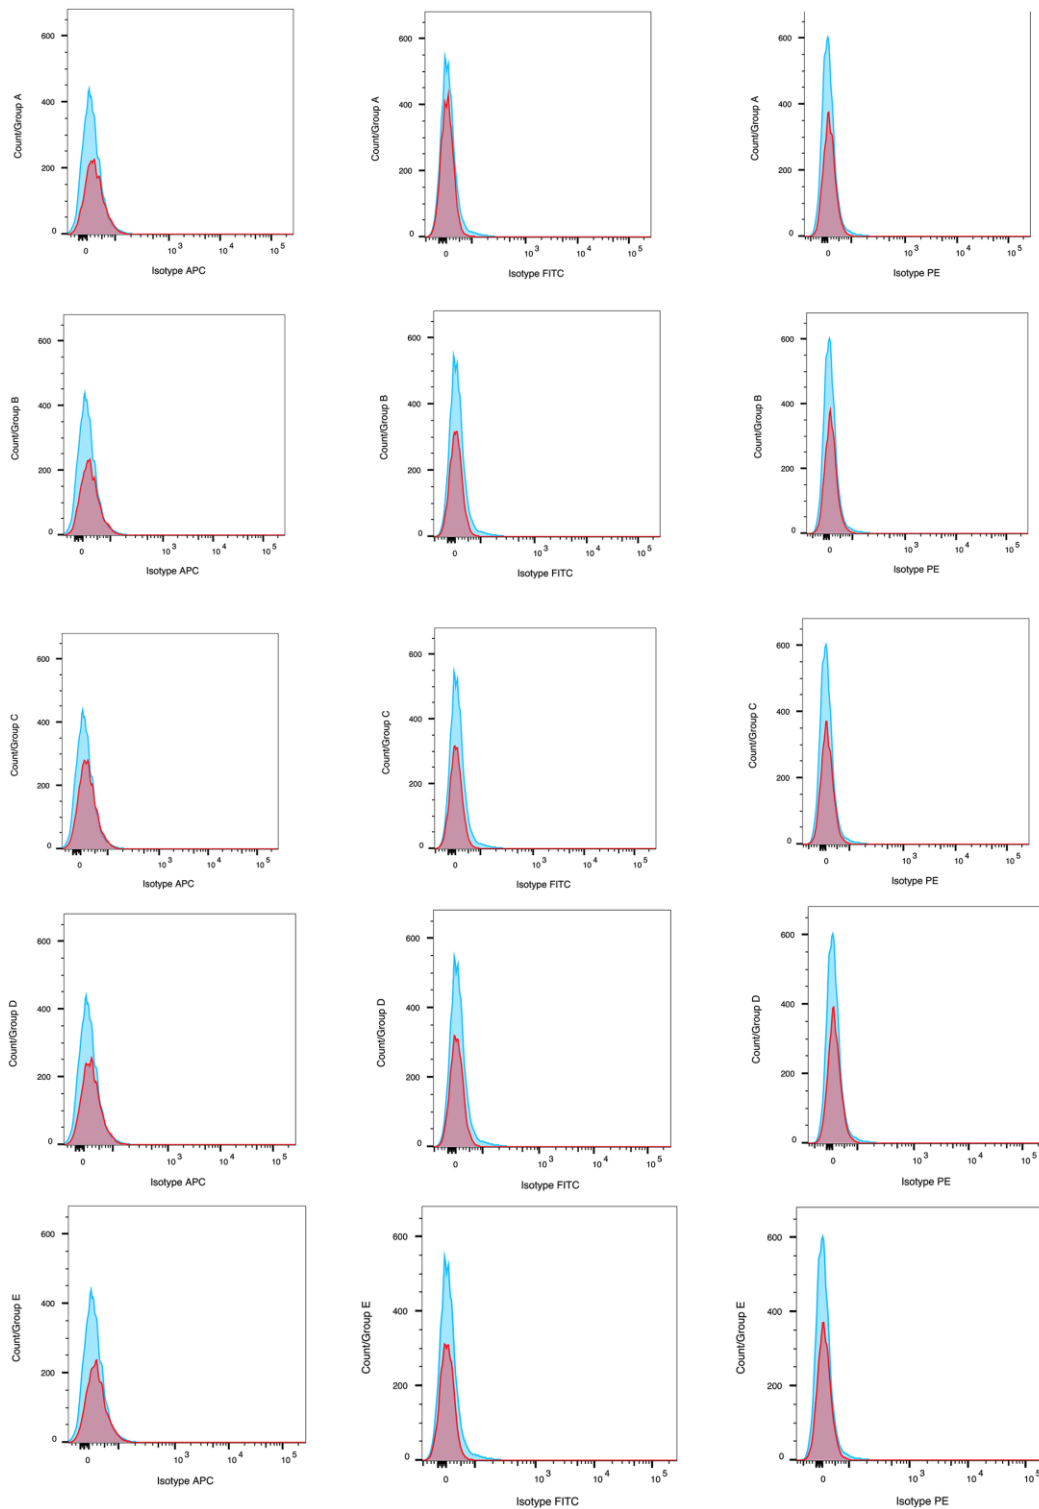

**Supplementary Figure 1. Representative histograms by FACS demonstrates no expression of isotype controls for APC, PE, and FITC in any of the 5 maternal age groups. Group A: 18-21; Group B: 22-25; Group C: 26-30; Group D: 31-35; Group E: 36 and over.**

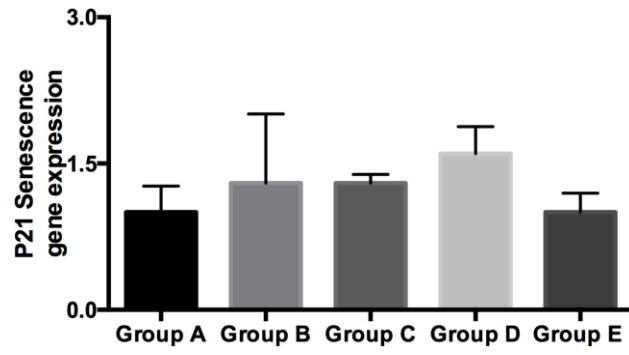

**Supplementary Figure 2. Graphs showing no difference in the gene expression of the senescence marker, p21, by real time PCR of all 5 age groups.** Group A: 18-21; Group B: 22-25; Group C: 26-30; Group D: 31-35; Group E: 36 and over.
